# Supplementary material
Source: PubMed Central journal article supplement (PMC7458065)
Supplement: mmc3.pdf [file mmc3.pdf]

| pub_date  | site   | n  | pub_cum |
|-----------|--------|----|---------|
| 1/17/2020 | PubMed | 2  | 2       |
| 1/18/2020 | PubMed | 1  | 3       |
| 1/19/2020 | PubMed | 1  | 4       |
| 1/22/2020 | PubMed | 2  | 6       |
| 1/23/2020 | PubMed | 2  | 8       |
| 1/24/2020 | PubMed | 3  | 11      |
| 1/25/2020 | PubMed | 3  | 14      |
| 1/26/2020 | PubMed | 3  | 17      |
| 1/28/2020 | PubMed | 6  | 23      |
| 1/29/2020 | PubMed | 4  | 27      |
| 1/30/2020 | PubMed | 13 | 40      |
| 1/31/2020 | PubMed | 7  | 47      |
| 2/1/2020  | PubMed | 9  | 56      |
| 2/2/2020  | PubMed | 6  | 62      |
| 2/3/2020  | PubMed | 8  | 70      |
| 2/6/2020  | PubMed | 43 | 113     |
| 2/7/2020  | PubMed | 17 | 130     |
| 2/8/2020  | PubMed | 20 | 150     |
| 2/9/2020  | PubMed | 13 | 163     |
| 2/10/2020 | PubMed | 13 | 176     |
| 2/11/2020 | PubMed | 6  | 182     |
| 2/12/2020 | PubMed | 16 | 198     |
| 2/13/2020 | PubMed | 30 | 228     |
| 2/14/2020 | PubMed | 21 | 249     |
| 2/15/2020 | PubMed | 22 | 271     |
| 2/16/2020 | PubMed | 9  | 280     |
| 2/18/2020 | PubMed | 23 | 303     |
| 2/19/2020 | PubMed | 8  | 311     |
| 2/20/2020 | PubMed | 29 | 340     |
| 2/23/2020 | PubMed | 78 | 418     |
| 2/24/2020 | PubMed | 13 | 431     |
| 2/25/2020 | PubMed | 19 | 450     |
| 2/26/2020 | PubMed | 23 | 473     |
| 2/27/2020 | PubMed | 28 | 501     |
| 2/28/2020 | PubMed | 35 | 536     |
| 2/29/2020 | PubMed | 32 | 568     |
| 3/1/2020  | PubMed | 21 | 589     |
| 3/3/2020  | PubMed | 62 | 651     |
| 3/4/2020  | PubMed | 52 | 703     |
| 3/5/2020  | PubMed | 31 | 734     |
| 3/7/2020  | PubMed | 88 | 822     |
| 3/8/2020  | PubMed | 30 | 852     |
| 3/9/2020  | PubMed | 16 | 868     |
| 3/10/2020 | PubMed | 38 | 906     |
| 3/11/2020 | PubMed | 41 | 947     |
| 3/12/2020 | PubMed | 44 | 991     |
| 3/13/2020 | PubMed | 42 | 1033    |
| 3/14/2020 | PubMed | 49 | 1082    |
| 3/15/2020 | PubMed | 34 | 1116    |
| 3/17/2020 | PubMed | 80 | 1196    |
| 3/18/2020 | PubMed | 63 | 1259    |
| 3/19/2020 | PubMed | 63 | 1322    |
| 3/20/2020 | PubMed | 49 | 1371    |
| 3/21/2020 | PubMed | 96 | 1467    |

|                  |     |       |
|------------------|-----|-------|
| 3/22/2020 PubMed | 53  | 1520  |
| 3/23/2020 PubMed | 30  | 1550  |
| 3/24/2020 PubMed | 84  | 1634  |
| 3/25/2020 PubMed | 82  | 1716  |
| 3/26/2020 PubMed | 14  | 1730  |
| 3/27/2020 PubMed | 89  | 1819  |
| 3/28/2020 PubMed | 83  | 1902  |
| 3/29/2020 PubMed | 116 | 2018  |
| 3/30/2020 PubMed | 92  | 2110  |
| 3/31/2020 PubMed | 52  | 2162  |
| 4/1/2020 PubMed  | 127 | 2289  |
| 4/2/2020 PubMed  | 134 | 2423  |
| 4/3/2020 PubMed  | 280 | 2703  |
| 4/4/2020 PubMed  | 178 | 2881  |
| 4/5/2020 PubMed  | 121 | 3002  |
| 4/6/2020 PubMed  | 52  | 3054  |
| 4/7/2020 PubMed  | 144 | 3198  |
| 4/8/2020 PubMed  | 161 | 3359  |
| 4/9/2020 PubMed  | 190 | 3549  |
| 4/10/2020 PubMed | 202 | 3751  |
| 4/11/2020 PubMed | 165 | 3916  |
| 4/12/2020 PubMed | 110 | 4026  |
| 4/13/2020 PubMed | 75  | 4101  |
| 4/14/2020 PubMed | 267 | 4368  |
| 4/15/2020 PubMed | 225 | 4593  |
| 4/16/2020 PubMed | 324 | 4917  |
| 4/17/2020 PubMed | 242 | 5159  |
| 4/18/2020 PubMed | 291 | 5450  |
| 4/19/2020 PubMed | 181 | 5631  |
| 4/20/2020 PubMed | 117 | 5748  |
| 4/21/2020 PubMed | 231 | 5979  |
| 4/22/2020 PubMed | 282 | 6261  |
| 4/23/2020 PubMed | 253 | 6514  |
| 4/24/2020 PubMed | 274 | 6788  |
| 4/25/2020 PubMed | 345 | 7133  |
| 4/26/2020 PubMed | 223 | 7356  |
| 4/27/2020 PubMed | 132 | 7488  |
| 4/28/2020 PubMed | 245 | 7733  |
| 4/29/2020 PubMed | 369 | 8102  |
| 4/30/2020 PubMed | 353 | 8455  |
| 5/1/2020 PubMed  | 284 | 8739  |
| 5/2/2020 PubMed  | 220 | 8959  |
| 5/3/2020 PubMed  | 135 | 9094  |
| 5/4/2020 PubMed  | 298 | 9392  |
| 5/5/2020 PubMed  | 269 | 9661  |
| 5/6/2020 PubMed  | 304 | 9965  |
| 5/7/2020 PubMed  | 361 | 10326 |
| 5/8/2020 PubMed  | 413 | 10739 |
| 5/10/2020 PubMed | 389 | 11128 |
| 5/11/2020 PubMed | 267 | 11395 |
| 5/12/2020 PubMed | 330 | 11725 |
| 5/13/2020 PubMed | 316 | 12041 |
| 5/14/2020 PubMed | 455 | 12496 |
| 5/15/2020 PubMed | 549 | 13045 |
| 5/16/2020 PubMed | 366 | 13411 |

|           |         |     |       |
|-----------|---------|-----|-------|
| 5/18/2020 | PubMed  | 362 | 13773 |
| 5/19/2020 | PubMed  | 386 | 14159 |
| 5/20/2020 | PubMed  | 699 | 14858 |
| 5/21/2020 | PubMed  | 332 | 15190 |
| 5/22/2020 | PubMed  | 372 | 15562 |
| 5/23/2020 | PubMed  | 326 | 15888 |
| 5/24/2020 | PubMed  | 193 | 16081 |
| 1/13/2020 | medrxiv | 1   | 1     |
| 1/24/2020 | medrxiv | 1   | 2     |
| 1/28/2020 | medrxiv | 3   | 5     |
| 1/29/2020 | medrxiv | 1   | 6     |
| 1/30/2020 | medrxiv | 2   | 8     |
| 2/2/2020  | medrxiv | 7   | 15    |
| 2/3/2020  | medrxiv | 1   | 16    |
| 2/4/2020  | medrxiv | 3   | 19    |
| 2/5/2020  | medrxiv | 11  | 30    |
| 2/6/2020  | medrxiv | 1   | 31    |
| 2/7/2020  | medrxiv | 2   | 33    |
| 2/9/2020  | medrxiv | 3   | 36    |
| 2/11/2020 | medrxiv | 15  | 51    |
| 2/12/2020 | medrxiv | 13  | 64    |
| 2/13/2020 | medrxiv | 11  | 75    |
| 2/14/2020 | medrxiv | 4   | 79    |
| 2/17/2020 | medrxiv | 10  | 89    |
| 2/18/2020 | medrxiv | 15  | 104   |
| 2/19/2020 | medrxiv | 5   | 109   |
| 2/20/2020 | medrxiv | 16  | 125   |
| 2/21/2020 | medrxiv | 1   | 126   |
| 2/23/2020 | medrxiv | 33  | 159   |
| 2/24/2020 | medrxiv | 2   | 161   |
| 2/25/2020 | medrxiv | 26  | 187   |
| 2/26/2020 | medrxiv | 8   | 195   |
| 2/27/2020 | medrxiv | 17  | 212   |
| 2/29/2020 | medrxiv | 17  | 229   |
| 3/1/2020  | medrxiv | 4   | 233   |
| 3/2/2020  | medrxiv | 2   | 235   |
| 3/3/2020  | medrxiv | 24  | 259   |
| 3/4/2020  | medrxiv | 1   | 260   |
| 3/5/2020  | medrxiv | 1   | 261   |
| 3/6/2020  | medrxiv | 44  | 305   |
| 3/7/2020  | medrxiv | 1   | 306   |
| 3/8/2020  | medrxiv | 22  | 328   |
| 3/9/2020  | medrxiv | 2   | 330   |
| 3/10/2020 | medrxiv | 21  | 351   |
| 3/12/2020 | medrxiv | 9   | 360   |
| 3/13/2020 | medrxiv | 23  | 383   |
| 3/16/2020 | medrxiv | 26  | 409   |
| 3/17/2020 | medrxiv | 25  | 434   |
| 3/18/2020 | medrxiv | 20  | 454   |
| 3/19/2020 | medrxiv | 1   | 455   |
| 3/20/2020 | medrxiv | 57  | 512   |
| 3/21/2020 | medrxiv | 2   | 514   |
| 3/23/2020 | medrxiv | 40  | 554   |
| 3/24/2020 | medrxiv | 20  | 574   |
| 3/25/2020 | medrxiv | 2   | 576   |

|                   |     |      |
|-------------------|-----|------|
| 3/26/2020 medrxiv | 24  | 600  |
| 3/27/2020 medrxiv | 71  | 671  |
| 3/28/2020 medrxiv | 1   | 672  |
| 3/29/2020 medrxiv | 1   | 673  |
| 3/30/2020 medrxiv | 108 | 781  |
| 3/31/2020 medrxiv | 19  | 800  |
| 4/1/2020 medrxiv  | 34  | 834  |
| 4/2/2020 medrxiv  | 15  | 849  |
| 4/3/2020 medrxiv  | 26  | 875  |
| 4/4/2020 medrxiv  | 12  | 887  |
| 4/6/2020 medrxiv  | 88  | 975  |
| 4/7/2020 medrxiv  | 65  | 1040 |
| 4/8/2020 medrxiv  | 20  | 1060 |
| 4/10/2020 medrxiv | 37  | 1097 |
| 4/11/2020 medrxiv | 108 | 1205 |
| 4/12/2020 medrxiv | 1   | 1206 |
| 4/13/2020 medrxiv | 1   | 1207 |
| 4/14/2020 medrxiv | 76  | 1283 |
| 4/15/2020 medrxiv | 35  | 1318 |
| 4/16/2020 medrxiv | 14  | 1332 |
| 4/17/2020 medrxiv | 124 | 1456 |
| 4/18/2020 medrxiv | 30  | 1486 |
| 4/19/2020 medrxiv | 7   | 1493 |
| 4/20/2020 medrxiv | 23  | 1516 |
| 4/21/2020 medrxiv | 26  | 1542 |
| 4/22/2020 medrxiv | 89  | 1631 |
| 4/23/2020 medrxiv | 49  | 1680 |
| 4/24/2020 medrxiv | 69  | 1749 |
| 4/25/2020 medrxiv | 27  | 1776 |
| 4/26/2020 medrxiv | 12  | 1788 |
| 4/27/2020 medrxiv | 37  | 1825 |
| 4/28/2020 medrxiv | 31  | 1856 |
| 4/29/2020 medrxiv | 101 | 1957 |
| 4/30/2020 medrxiv | 27  | 1984 |
| 5/1/2020 medrxiv  | 83  | 2067 |
| 5/2/2020 medrxiv  | 38  | 2105 |
| 5/3/2020 medrxiv  | 33  | 2138 |
| 5/4/2020 medrxiv  | 20  | 2158 |
| 5/5/2020 medrxiv  | 100 | 2258 |
| 5/6/2020 medrxiv  | 95  | 2353 |
| 5/7/2020 medrxiv  | 13  | 2366 |
| 5/8/2020 medrxiv  | 119 | 2485 |
| 5/9/2020 medrxiv  | 37  | 2522 |
| 5/10/2020 medrxiv | 25  | 2547 |
| 5/11/2020 medrxiv | 73  | 2620 |
| 5/12/2020 medrxiv | 51  | 2671 |
| 5/13/2020 medrxiv | 46  | 2717 |
| 5/14/2020 medrxiv | 30  | 2747 |
| 5/15/2020 medrxiv | 43  | 2790 |
| 5/16/2020 medrxiv | 49  | 2839 |
| 5/17/2020 medrxiv | 4   | 2843 |
| 5/18/2020 medrxiv | 89  | 2932 |
| 5/19/2020 medrxiv | 66  | 2998 |
| 5/20/2020 medrxiv | 63  | 3061 |
| 5/21/2020 medrxiv | 34  | 3095 |

|           |         |    |      |
|-----------|---------|----|------|
| 5/22/2020 | medrxiv | 66 | 3161 |
| 5/23/2020 | medrxiv | 41 | 3202 |
| 5/24/2020 | medrxiv | 24 | 3226 |
| 5/25/2020 | medrxiv | 42 | 3268 |
| 1/19/2020 | biorxiv | 1  | 1    |
| 1/21/2020 | biorxiv | 1  | 2    |
| 1/22/2020 | biorxiv | 1  | 3    |
| 1/23/2020 | biorxiv | 2  | 5    |
| 1/24/2020 | biorxiv | 4  | 9    |
| 1/25/2020 | biorxiv | 4  | 13   |
| 1/26/2020 | biorxiv | 3  | 16   |
| 1/27/2020 | biorxiv | 1  | 17   |
| 1/28/2020 | biorxiv | 5  | 22   |
| 1/29/2020 | biorxiv | 2  | 24   |
| 1/30/2020 | biorxiv | 2  | 26   |
| 1/31/2020 | biorxiv | 4  | 30   |
| 2/2/2020  | biorxiv | 4  | 34   |
| 2/3/2020  | biorxiv | 2  | 36   |
| 2/4/2020  | biorxiv | 5  | 41   |
| 2/7/2020  | biorxiv | 1  | 42   |
| 2/8/2020  | biorxiv | 1  | 43   |
| 2/10/2020 | biorxiv | 1  | 44   |
| 2/11/2020 | biorxiv | 6  | 50   |
| 2/12/2020 | biorxiv | 1  | 51   |
| 2/13/2020 | biorxiv | 3  | 54   |
| 2/14/2020 | biorxiv | 2  | 56   |
| 2/15/2020 | biorxiv | 1  | 57   |
| 2/18/2020 | biorxiv | 5  | 62   |
| 2/19/2020 | biorxiv | 1  | 63   |
| 2/20/2020 | biorxiv | 12 | 75   |
| 2/21/2020 | biorxiv | 8  | 83   |
| 2/24/2020 | biorxiv | 1  | 84   |
| 2/27/2020 | biorxiv | 8  | 92   |
| 2/28/2020 | biorxiv | 1  | 93   |
| 3/2/2020  | biorxiv | 13 | 106  |
| 3/3/2020  | biorxiv | 4  | 110  |
| 3/4/2020  | biorxiv | 1  | 111  |
| 3/5/2020  | biorxiv | 4  | 115  |
| 3/6/2020  | biorxiv | 1  | 116  |
| 3/7/2020  | biorxiv | 8  | 124  |
| 3/8/2020  | biorxiv | 2  | 126  |
| 3/9/2020  | biorxiv | 1  | 127  |
| 3/10/2020 | biorxiv | 4  | 131  |
| 3/12/2020 | biorxiv | 9  | 140  |
| 3/14/2020 | biorxiv | 12 | 152  |
| 3/15/2020 | biorxiv | 1  | 153  |
| 3/17/2020 | biorxiv | 14 | 167  |
| 3/20/2020 | biorxiv | 6  | 173  |
| 3/21/2020 | biorxiv | 8  | 181  |
| 3/22/2020 | biorxiv | 2  | 183  |
| 3/23/2020 | biorxiv | 1  | 184  |
| 3/24/2020 | biorxiv | 2  | 186  |
| 3/25/2020 | biorxiv | 5  | 191  |
| 3/26/2020 | biorxiv | 2  | 193  |
| 3/27/2020 | biorxiv | 8  | 201  |

|           |         |    |     |
|-----------|---------|----|-----|
| 3/28/2020 | biorxiv | 11 | 212 |
| 3/29/2020 | biorxiv | 3  | 215 |
| 3/30/2020 | biorxiv | 5  | 220 |
| 3/31/2020 | biorxiv | 19 | 239 |
| 4/1/2020  | biorxiv | 3  | 242 |
| 4/2/2020  | biorxiv | 9  | 251 |
| 4/3/2020  | biorxiv | 6  | 257 |
| 4/4/2020  | biorxiv | 2  | 259 |
| 4/5/2020  | biorxiv | 20 | 279 |
| 4/6/2020  | biorxiv | 2  | 281 |
| 4/8/2020  | biorxiv | 8  | 289 |
| 4/9/2020  | biorxiv | 21 | 310 |
| 4/10/2020 | biorxiv | 16 | 326 |
| 4/11/2020 | biorxiv | 14 | 340 |
| 4/12/2020 | biorxiv | 11 | 351 |
| 4/13/2020 | biorxiv | 2  | 353 |
| 4/14/2020 | biorxiv | 12 | 365 |
| 4/15/2020 | biorxiv | 15 | 380 |
| 4/16/2020 | biorxiv | 1  | 381 |
| 4/17/2020 | biorxiv | 8  | 389 |
| 4/18/2020 | biorxiv | 14 | 403 |
| 4/19/2020 | biorxiv | 6  | 409 |
| 4/20/2020 | biorxiv | 16 | 425 |
| 4/21/2020 | biorxiv | 12 | 437 |
| 4/22/2020 | biorxiv | 7  | 444 |
| 4/23/2020 | biorxiv | 12 | 456 |
| 4/24/2020 | biorxiv | 18 | 474 |
| 4/25/2020 | biorxiv | 15 | 489 |
| 4/26/2020 | biorxiv | 4  | 493 |
| 4/27/2020 | biorxiv | 10 | 503 |
| 4/28/2020 | biorxiv | 3  | 506 |
| 4/29/2020 | biorxiv | 11 | 517 |
| 4/30/2020 | biorxiv | 10 | 527 |
| 5/1/2020  | biorxiv | 15 | 542 |
| 5/2/2020  | biorxiv | 10 | 552 |
| 5/3/2020  | biorxiv | 3  | 555 |
| 5/4/2020  | biorxiv | 10 | 565 |
| 5/5/2020  | biorxiv | 11 | 576 |
| 5/6/2020  | biorxiv | 10 | 586 |
| 5/7/2020  | biorxiv | 11 | 597 |
| 5/8/2020  | biorxiv | 17 | 614 |
| 5/9/2020  | biorxiv | 7  | 621 |
| 5/10/2020 | biorxiv | 6  | 627 |
| 5/11/2020 | biorxiv | 5  | 632 |
| 5/12/2020 | biorxiv | 14 | 646 |
| 5/13/2020 | biorxiv | 19 | 665 |
| 5/14/2020 | biorxiv | 17 | 682 |
| 5/15/2020 | biorxiv | 27 | 709 |
| 5/16/2020 | biorxiv | 3  | 712 |
| 5/17/2020 | biorxiv | 13 | 725 |
| 5/18/2020 | biorxiv | 9  | 734 |
| 5/19/2020 | biorxiv | 10 | 744 |
| 5/20/2020 | biorxiv | 15 | 759 |
| 5/21/2020 | biorxiv | 13 | 772 |
| 5/22/2020 | biorxiv | 11 | 783 |

|                   |    |     |
|-------------------|----|-----|
| 5/23/2020 biorxiv | 13 | 796 |
| 5/24/2020 biorxiv | 4  | 800 |
| 5/25/2020 biorxiv | 1  | 801 |
